# Supplementary material for: PhlG mediates the conversion of DAPG to MAPG in Pseudomonas fluorescens 2P24
Source: PubMed Central journal article supplement (PMC7062750; doi:10.1038/s41598-020-60555-9), 2020-03-09
Supplement: 41598_2020_60555_MOESM1_ESM.pdf [file 41598_2020_60555_MOESM1_ESM.pdf]

**Title:** PhlG mediates the conversion of DAPG to MAPG in  
*Pseudomonas fluorescens* 2P24

**Author list:** Zhao Ming-min<sup>1†</sup>, Lyu Ning<sup>1†</sup>, Wang Dong<sup>1</sup>, Wu Xiao-gang<sup>2</sup>, Zhao Yuan-zheng<sup>4</sup>, Zhang Li-qun<sup>2,3</sup> and Zhou Hong-you<sup>1\*</sup>

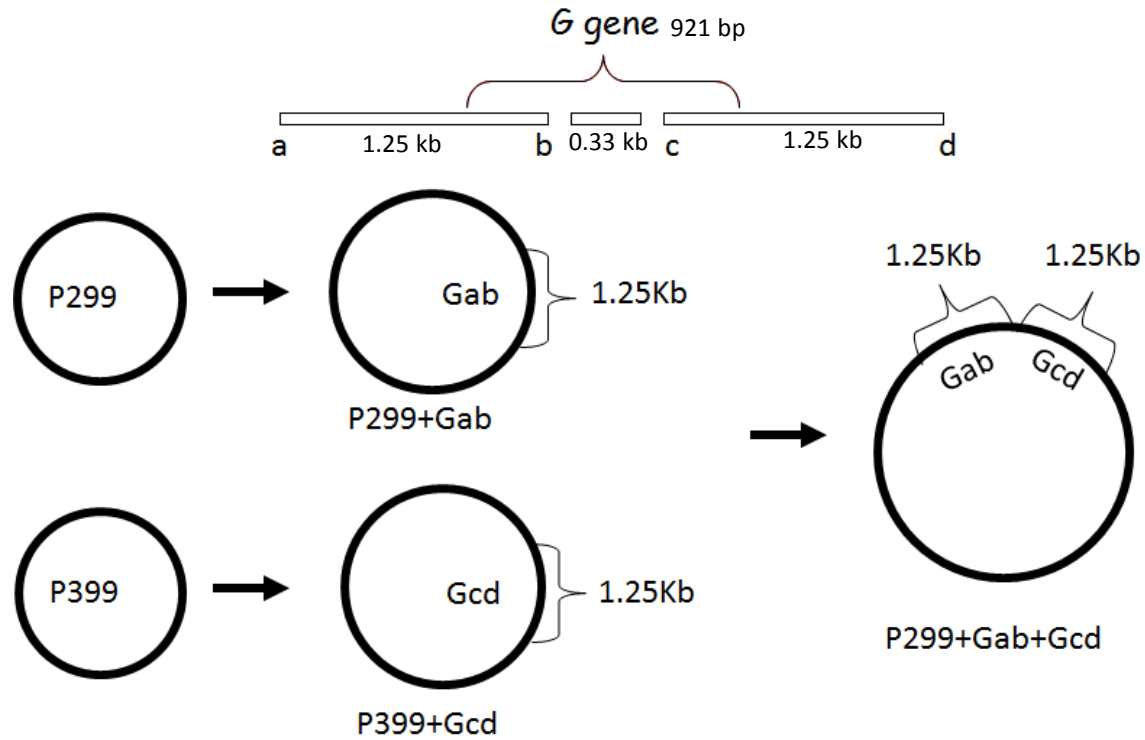

**Figure S1 Schematic diagram of plasmid construction**

**A**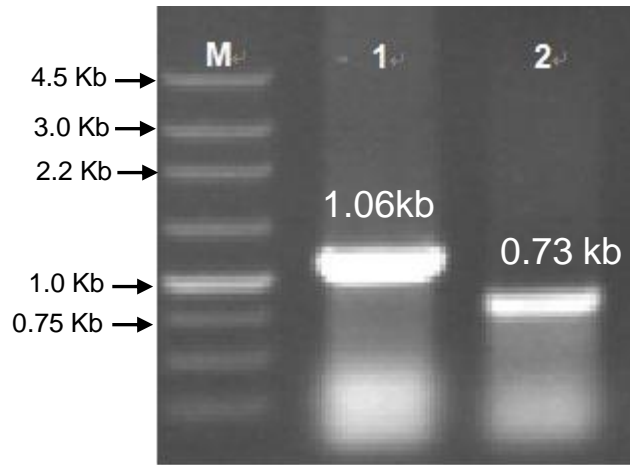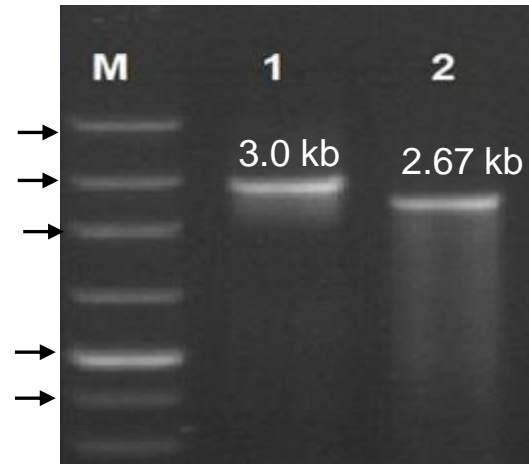**C**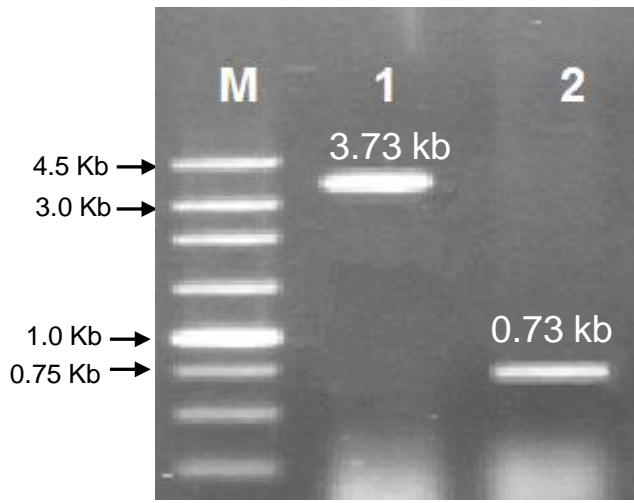**D**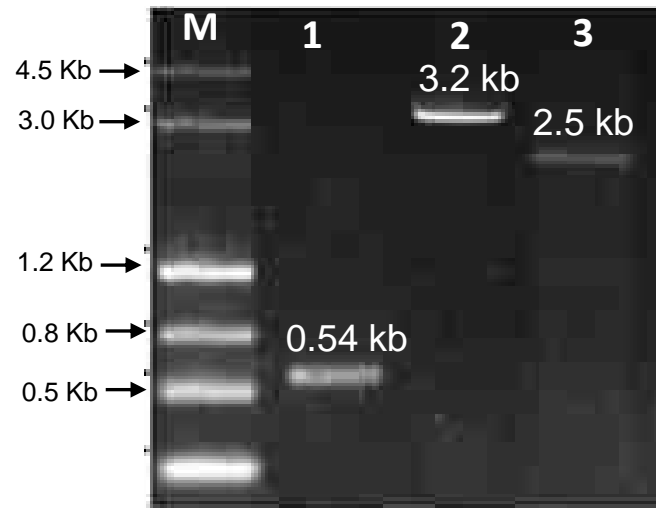**E**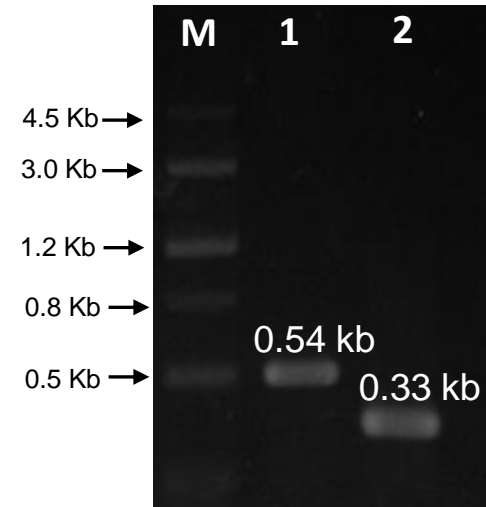

**Figure S2 The diagnostic PCR to confirm mutants**

**CK**

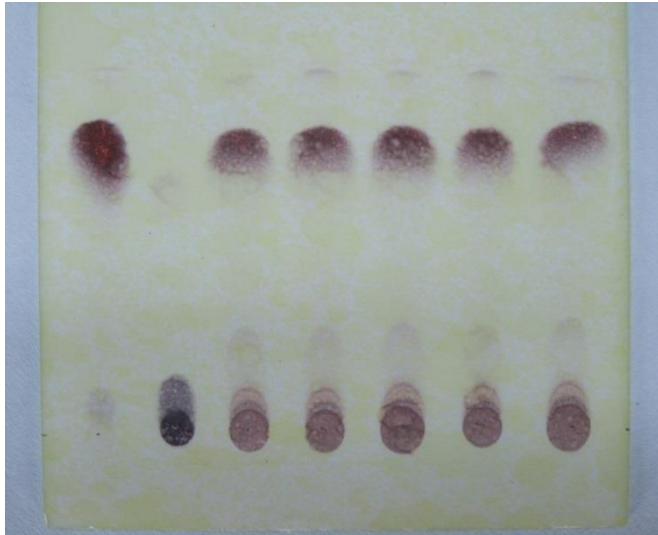

**PM901**

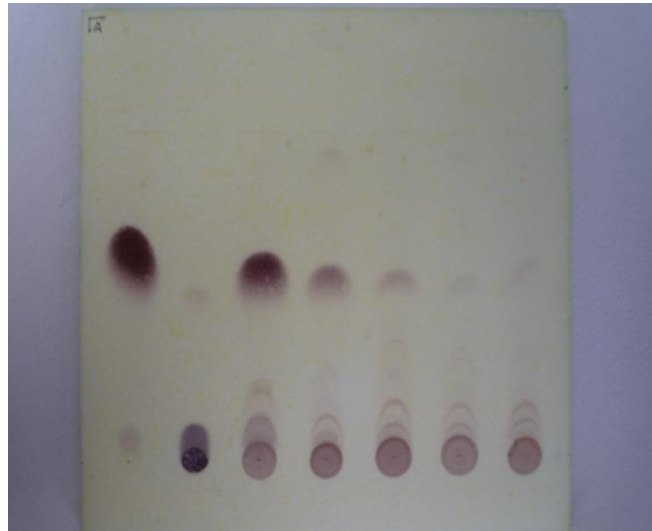

**PM901-G**

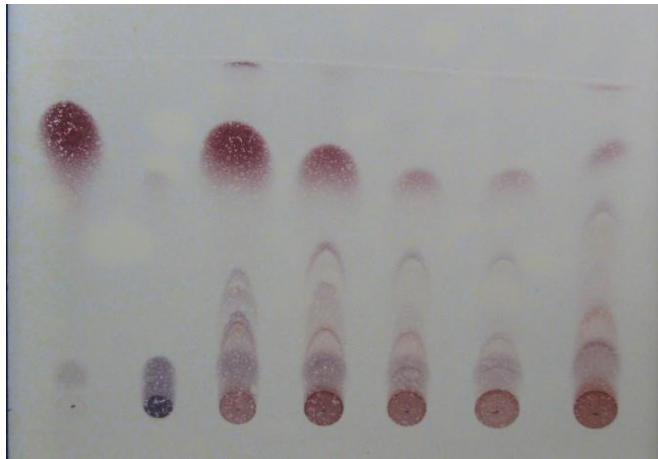

**PM901- $\Delta$ G**

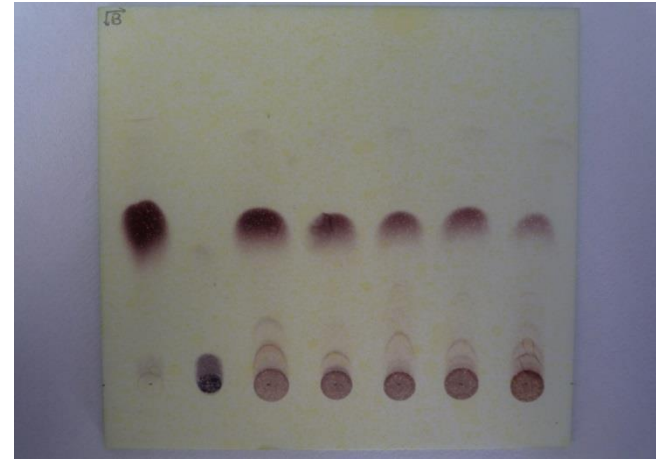

**Figure S3 Original pictures of Figure 3B**
