# Supplementary material for: PhlG mediates the conversion of DAPG to MAPG in Pseudomonas fluorescens 2P24
Source: PubMed Central journal article supplement (PMC7062750; doi:10.1038/s41598-020-60555-9), 2020-03-09
Supplement: 41598_2020_60555_MOESM2_ESM.pdf [file 41598_2020_60555_MOESM2_ESM.pdf]

**Title:** PhlG mediates the conversion of DAPG to MAPG in *Pseudomonas fluorescens* 2P24

**Author list:** Zhao Ming-min<sup>1†</sup>, Lyu Ning<sup>1†</sup>, Wang Dong<sup>1</sup>, Wu Xiao-gang<sup>2</sup>, Zhao Yuan-zheng<sup>4</sup>, Zhang Li-qun<sup>2,3</sup> and Zhou Hong-you<sup>1\*</sup>

### **Figure S1 Schematic diagram of plasmid construction**

To generate the *phlG* deletion mutant p299 $\Delta$ phlG, fragments flanking the *phlG* gene were amplified with four pair of primers using 2P24 genomic DNA as template. The left flanking sequence and the right flanking sequence of the *phlG* gene were amplified. After digestion with the relevant restriction enzymes, PCR fragments Gab and Gcd were cloned into pHSG299 and pHSG399 (TaKaRa), respectively. The excised fragment of p399 $\Delta$ Gcd digested by *HindIII* and *BamHI* was ligated into the corresponding plasmid p299 $\Delta$ phlG. The two fragments were ligated at the *BamHI* site to create p299 $\Delta$ phlG mutant.

### **Figure S2 The diagnostic PCR to confirm mutant genotypes**

(A) PCR detection of recombinant plasmid p299 $\Delta$ G using primer G1/G2.

1: the fragment (1.06 kb) amplified from 2P24 genomic DNA by PCR; 2: the fragment (0.75 kb) amplified from p299 $\Delta$ G. (B) PCR detection of recombinant plasmid p299 $\Delta$ G using primer Ga/Gd. M: marker(1kb DNA Ladder marker, TaKaRa);

1: the fragment (3.0 kb) amplified from 2P24 genomic DNA by PCR; 2: the fragment (2.67 kb) amplified from p299 $\Delta$ G. (C) PCR detection of recombinant plasmid

2P24-LaZ-G. 1: the fragment (3.73 kb) amplified from 2P24-LacZ-G by PCR; 2: the fragment (0.73 kb) amplified from 2P24- $\Delta$ G. (D) PCR detection of the 2P24 $\Delta$ GacS.1:

the Control 0.54 kb fragment; 2: the fragment (3.2 kb) amplified from 2P24- $\Delta$ GacS; 3: the fragment (2.5 kb) amplified from 2P24- $\Delta$ GacS. (E) PCR detection of the

2P24- $\Delta$ RsmE. 1: the fragment (0.54 bp) amplified from 2P24; 2: the fragment (0.33 bp) amplified from 2P24- $\Delta$ RsmE.

**Figure S3 Original pictures of Figure 3B**

The original pictures of figure 3B are shown and used for making the quantification by Quantity ONE software for figure 3C.
