# Supplementary material for: PhlG mediates the conversion of DAPG to MAPG in Pseudomonas fluorescens 2P24
Source: PubMed Central journal article supplement (PMC7062750; doi:10.1038/s41598-020-60555-9), 2020-03-09
Supplement: 41598_2020_60555_MOESM3_ESM.pdf [file 41598_2020_60555_MOESM3_ESM.pdf]

**Title:** PhlG mediates the conversion of DAPG to MAPG in *Pseudomonas fluorescens* 2P24

**Author list:** Zhao Ming-min<sup>1†</sup>, Lyu Ning<sup>1†</sup>, Wang Dong<sup>1</sup>, Wu Xiao-gang<sup>2</sup>, Zhao Yuan-zheng<sup>4</sup>, Zhang Li-qun<sup>2,3</sup> and Zhou Hong-you<sup>1\*</sup>

**Table S1 The bacterial strains and plasmids used in this study**

| Strains or plasmids        | Characteristics                                                                                 | Source                   |
|----------------------------|-------------------------------------------------------------------------------------------------|--------------------------|
| <b>Strains</b>             |                                                                                                 |                          |
| <i>P. fluorescens</i> 2P24 | Wild-type, Ap <sup>r</sup>                                                                      | Wei et al., 2005         |
| <i>E. Coli</i> DH5α        | F- recA1 endA1 hsdR17 deoR thi-1 supE44 gyrA96<br>relA1Δ (lacZYA-argF)U169λ-(Φ80dlacZ Δ M15)    | Stratagene, La Jolla, CA |
| PM901                      | Derivative of <i>P. fluorescens</i> 2P24, <i>phlA-lacZ</i> reporter fusion, Ap <sup>r</sup>     | Zhou et al., 2010        |
| 2P24-ΔG                    | <i>phlG</i> deletion mutant, Ap <sup>r</sup>                                                    | This study               |
| 2P24-G                     | 2P24-ΔG with plasmid p415- <i>phlG</i> , Ap <sup>r</sup> , Tc <sup>r</sup>                      | This study               |
| 2P24-LacZ-G                | Derivative of <i>P. fluorescens</i> 2P24, <i>phlG-lacZ</i> reporter fusion, Ap <sup>r</sup>     | This study               |
| 2P24-LacZ-G-ΔGacS          | <i>GacS</i> deletion mutant, Ap <sup>r</sup>                                                    | This study               |
| 2P24-LacZ-G-ΔRsmE          | <i>RsmE</i> deletion mutant, Ap <sup>r</sup>                                                    | This study               |
| PM901-G                    | PM901-ΔG with plasmid p415- <i>phlG</i> , Ap <sup>r</sup> , Tc <sup>r</sup>                     | This study               |
| CPF-10                     | Wild-type, Sm <sup>r</sup> , Ap <sup>r</sup>                                                    | Wu et al., 2012          |
| S-16                       | Wild-type, Sm <sup>r</sup>                                                                      | Wu et al., 2012          |
| <i>Rhizoctonia solani</i>  | Causing cotton damping-off                                                                      | This study               |
| <b>Plasmids</b>            |                                                                                                 |                          |
| pHSG299                    | Suicide plasmid for <i>Pseudomonas</i> spp., used for homologous recombination, Km <sup>r</sup> | TaKaRa                   |
| pHSG399                    | Suicide plasmid for <i>Pseudomonas</i> spp., used for homologous recombination, Cm <sup>r</sup> | TaKaRa                   |
| pRK415                     | Broad-host-rang cloning vector; IncP1 replicon; polylinker of pUC19;<br>Mob+ ; Tet <sup>r</sup> | Keen, <i>et al.</i>      |
| P415- <i>phlG</i>          | pRK415 containing intact <i>phlG</i> gene, Tc <sup>r</sup>                                      | This study               |
| p299-Δ <i>phlG</i>         | pHSG299 containing <i>phlG</i> deletion structure, Km <sup>r</sup>                              | This study               |
| pSR47sΔ <i>GacS</i>        | pSR47s containing <i>GacS</i> deletion structure, Km <sup>r</sup>                               | Wei et al., 2004         |
| pBSKm Δ <i>RsmE</i>        | pBSKm containing <i>RsmE</i> deletion structure, Kmr                                            | Liu et al., 2011         |

Note: Km<sup>r</sup>, Cm<sup>r</sup>, Tc<sup>r</sup>, Sm<sup>r</sup> and Ap<sup>r</sup> indicate resistance to ampicillin, kanamycin, chloramphenicol and tetracycline
