# Supplementary material for: PhlG mediates the conversion of DAPG to MAPG in Pseudomonas fluorescens 2P24
Source: PubMed Central journal article supplement (PMC7062750; doi:10.1038/s41598-020-60555-9), 2020-03-09
Supplement: 41598_2020_60555_MOESM6_ESM.pdf [file 41598_2020_60555_MOESM6_ESM.pdf]

**Title:** PhlG mediates the conversion of DAPG to MAPG in *Pseudomonas fluorescens* 2P24

**Author list:** Zhao Ming-min<sup>1†</sup>, Lyu Ning<sup>1†</sup>, Wang Dong<sup>1</sup>, Wu Xiao-gang<sup>2</sup>, Zhao Yuan-zheng<sup>4</sup>, Zhang Li-qun<sup>2,3</sup> and Zhou Hong-you<sup>1\*</sup>

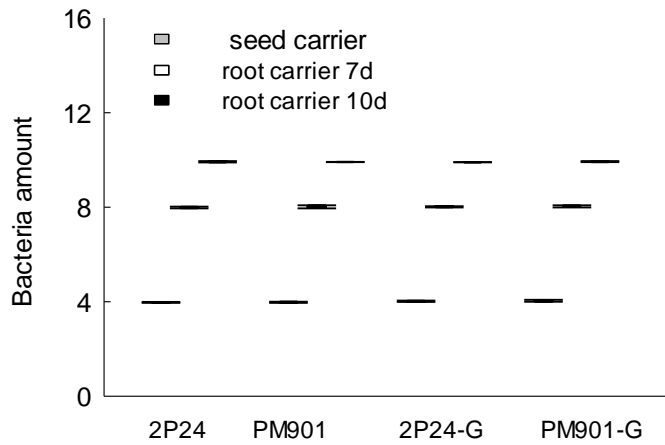

Seed carrier

LSD

| Treatment (I) | treatment (J) | Mean Difference (I-J) | Std. Error | Sig.     | 95% Confidence Interval |             |
|---------------|---------------|-----------------------|------------|----------|-------------------------|-------------|
|               |               |                       |            |          | Lower Bound             | Upper Bound |
| 2P24          | PM901         | -0.00874              | 0.017835   | 0.633086 | -0.04759                | 0.030122    |
|               | 2P24-△G       | -0.03997              | 0.017835   | 0.044716 | -0.07883                | -0.00111    |
|               | PM901-△G      | -0.06862              | 0.017835   | 0.002319 | -0.10748                | -0.02977    |
| PM901         | 2P24          | 0.008736              | 0.017835   | 0.633086 | -0.03012                | 0.047594    |
|               | 2P24-△G       | -0.03123              | 0.017835   | 0.10541  | -0.07009                | 0.007627    |
|               | PM901-△G      | -0.05989              | 0.017835   | 0.005695 | -0.09875                | -0.02103    |
| 2P24-△G       | 2P24          | 0.039968              | 0.017835   | 0.044716 | 0.001109                | 0.078826    |
|               | PM901         | 0.031232              | 0.017835   | 0.10541  | -0.00763                | 0.07009     |
|               | PM901-△G      | -0.02866              | 0.017835   | 0.134072 | -0.06752                | 0.010201    |
| PM901-△G      | 2P24          | 0.068625              | 0.017835   | 0.002319 | 0.029766                | 0.107483    |
|               | PM901         | 0.059889              | 0.017835   | 0.005695 | 0.02103                 | 0.098747    |
|               | 2P24-△G       | 0.028657              | 0.017835   | 0.134072 | -0.0102                 | 0.067516    |

\* The mean difference is significant at the 0.05 level.

2P24 c

PM901 bc

2P24-△G ab

PM901-△G a

**Root carrier 7d**

LSD

| treatment (I) | treatment (J) | Mean Difference<br>(I-J) | Std. Error | Sig.     | 95% Confidence Interval |             |
|---------------|---------------|--------------------------|------------|----------|-------------------------|-------------|
|               |               |                          |            |          | Lower Bound             | Upper Bound |
| 2P24          | PM901         | -0.04011                 | 0.0261     | 0.150265 | -0.09698                | 0.016755    |
|               | 2P24-△G       | -0.03823                 | 0.0261     | 0.168691 | -0.0951                 | 0.018637    |
|               | PM901-△G      | -0.05263                 | 0.0261     | 0.066697 | -0.1095                 | 0.004237    |
| PM901         | 2P24          | 0.040111                 | 0.0261     | 0.150265 | -0.01675                | 0.096977    |
|               | 2P24-△G       | 0.001882                 | 0.0261     | 0.943702 | -0.05498                | 0.058748    |
|               | PM901-△G      | -0.01252                 | 0.0261     | 0.640126 | -0.06938                | 0.044348    |
| 2P24-<br>△G   | 2P24          | 0.038229                 | 0.0261     | 0.168691 | -0.01864                | 0.095095    |
|               | PM901         | -0.00188                 | 0.0261     | 0.943702 | -0.05875                | 0.054984    |
|               | PM901-△G      | -0.0144                  | 0.0261     | 0.591265 | -0.07127                | 0.042466    |
| PM901-△G      | 2P24          | 0.052629                 | 0.0261     | 0.066697 | -0.00424                | 0.109495    |
|               | PM901         | 0.012518                 | 0.0261     | 0.640126 | -0.04435                | 0.069384    |
|               | 2P24-△G       | 0.0144                   | 0.0261     | 0.591265 | -0.04247                | 0.071266    |

\* The mean difference is significant at the 0.05 level.

2P24 a

PM901 a

2P24-△G a

PM901-△G a

Root carrier 10d

LSD

| Treatment (I) | treatment (J) | Mean Difference<br>(I-J) | Std. Error | Sig.     | 95% Confidence Interval |             |
|---------------|---------------|--------------------------|------------|----------|-------------------------|-------------|
|               |               |                          |            |          | Lower Bound             | Upper Bound |
| 2P24          | PM901         | 0.012854                 | 0.011261   | 0.275933 | -0.01168                | 0.037389    |
|               | 2P24-△G       | 0.019299                 | 0.011261   | 0.112247 | -0.00524                | 0.043833    |
|               | PM901-△G      | 0.002292                 | 0.011261   | 0.842099 | -0.02224                | 0.026827    |
| PM901         | 2P24          | -0.01285                 | 0.011261   | 0.275933 | -0.03739                | 0.011681    |
|               | 2P24-△G       | 0.006445                 | 0.011261   | 0.577653 | -0.01809                | 0.03098     |
|               | PM901-△G      | -0.01056                 | 0.011261   | 0.366781 | -0.0351                 | 0.013973    |
| 2P24-<br>△G   | 2P24          | -0.0193                  | 0.011261   | 0.112247 | -0.04383                | 0.005236    |
|               | PM901         | -0.00644                 | 0.011261   | 0.577653 | -0.03098                | 0.01809     |
|               | PM901-△G      | -0.01701                 | 0.011261   | 0.156851 | -0.04154                | 0.007528    |
| PM901-△G      | 2P24          | -0.00229                 | 0.011261   | 0.842099 | -0.02683                | 0.022242    |
|               | PM901         | 0.010562                 | 0.011261   | 0.366781 | -0.01397                | 0.035096    |
|               | 2P24-△G       | 0.017006                 | 0.011261   | 0.156851 | -0.00753                | 0.041541    |

\* The mean difference is significant at the 0.05 level.

2P24 a

PM901 a

2P24-△G a

PM901-△G a
