# Supplementary material for: PhlG mediates the conversion of DAPG to MAPG in Pseudomonas fluorescens 2P24
Source: PubMed Central journal article supplement (PMC7062750; doi:10.1038/s41598-020-60555-9), 2020-03-09
Supplement: 41598_2020_60555_MOESM7_ESM.pdf [file 41598_2020_60555_MOESM7_ESM.pdf]

**Title:** PhlG mediates the conversion of DAPG to MAPG in *Pseudomonas fluorescens* 2P24

**Author list:** Zhao Ming-min<sup>1†</sup>, Lyu Ning<sup>1†</sup>, Wang Dong<sup>1</sup>, Wu Xiao-gang<sup>2</sup>, Zhao Yuan-zheng<sup>4</sup>, Zhang Li-qun<sup>2,3</sup> and Zhou Hong-you<sup>1\*</sup>

We performed multiple comparison by the one-way Anova analysis and LSD to test the differences.

### Length 7d

LSD

| treatment(I) |          | Mean Difference |            | Sig.  | 95% Confidence Interval |             |
|--------------|----------|-----------------|------------|-------|-------------------------|-------------|
|              |          | (I-J)           | Std. Error |       | Lower Bound             | Upper Bound |
| CK           | 2P24     | 4.32500*        | 0.74956    | 0.000 | 2.7274                  | 5.9226      |
|              | PM109    | 1.22500         | 0.74956    | 0.123 | -0.3726                 | 2.8226      |
|              | 2P24-ΔG  | 4.10000*        | 0.74956    | 0.000 | 2.5024                  | 5.6976      |
|              | PM109-ΔG | 0.62500         | 0.74956    | 0.417 | -0.9726                 | 2.2226      |
| 2P24         | CK       | -4.32500*       | 0.74956    | 0.000 | -5.9226                 | -2.7274     |
|              | PM109    | -3.10000*       | 0.74956    | 0.001 | -4.6976                 | -1.5024     |
|              | 2P24-ΔG  | -0.22500        | 0.74956    | 0.768 | -1.8226                 | 1.3726      |
|              | PM109-ΔG | -3.70000*       | 0.74956    | 0.000 | -5.2976                 | -2.1024     |
| PM901        | CK       | -1.22500        | 0.74956    | 0.123 | -2.8226                 | .3726       |
|              | 2P24     | 3.10000*        | 0.74956    | 0.001 | 1.5024                  | 4.6976      |
|              | 2P24-ΔG  | 2.87500*        | 0.74956    | 0.002 | 1.2774                  | 4.4726      |
|              | PM109-ΔG | -0.60000        | 0.74956    | 0.436 | -2.1976                 | 0.9976      |
| 2P24-ΔG      | CK       | -4.10000*       | 0.74956    | 0.000 | -5.6976                 | -2.5024     |
|              | 2P24     | 0.22500         | 0.74956    | 0.768 | -1.3726                 | 1.8226      |
|              | PM109    | -2.87500*       | 0.74956    | 0.002 | -4.4726                 | -1.2774     |
|              | PM109-ΔG | -3.47500*       | 0.74956    | 0.000 | -5.0726                 | -1.8774     |
| PM109-ΔG     | CK       | -0.62500        | 0.74956    | 0.417 | -2.2226                 | 0.9726      |
|              | 2P24     | 3.70000*        | 0.74956    | 0.000 | 2.1024                  | 5.2976      |
|              | PM109    | 0.60000         | 0.74956    | 0.436 | -0.9976                 | 2.1976      |
|              | 2P24-ΔG  | 3.47500*        | 0.74956    | 0.000 | 1.8774                  | 5.0726      |

\* The mean difference is significant at the 0.05 level.

CK a

2P24 b

PM901 a

2P24- ΔG b

PM109- ΔG a

## Length 10d

LSD

| treatment(I) | treatment(J) | Mean Difference (I-J) | Std. Error | Sig.  | 95% Confidence Interval |             |
|--------------|--------------|-----------------------|------------|-------|-------------------------|-------------|
|              |              |                       |            |       | Lower Bound             | Upper Bound |
| CK           | 2P24         | 4.50000*              | 1.40101    | 0.006 | 1.5138                  | 7.4862      |
|              | PM901        | 1.52500               | 1.40101    | 0.294 | -1.4612                 | 4.5112      |
|              | 2P24-ΔG      | 4.35000*              | 1.40101    | 0.007 | 1.3638                  | 7.3362      |
|              | PM109-ΔG     | -0.37500              | 1.40101    | 0.793 | -3.3612                 | 2.6112      |
| 2P24         | CK           | -4.50000*             | 1.40101    | 0.006 | -7.4862                 | -1.5138     |
|              | PM901        | -2.97500              | 1.40101    | 0.051 | -5.9612                 | 0.0112      |
|              | 2P24-ΔG      | -0.15000              | 1.40101    | 0.916 | -3.1362                 | 2.8362      |
|              | PM109-ΔG     | -4.87500*             | 1.40101    | 0.003 | -7.8612                 | -1.8888     |
| PM901        | CK           | -1.52500              | 1.40101    | 0.294 | -4.5112                 | 1.4612      |
|              | 2P24         | 2.97500               | 1.40101    | 0.051 | -0.0112                 | 5.9612      |
|              | 2P24-ΔG      | 2.82500               | 1.40101    | 0.062 | -0.1612                 | 5.8112      |
|              | PM109-ΔG     | -1.90000              | 1.40101    | 0.195 | -4.8862                 | 1.0862      |
| 2P24-ΔG      | CK           | -4.35000*             | 1.40101    | 0.007 | -7.3362                 | -1.3638     |
|              | 2P24         | 0.15000               | 1.40101    | 0.916 | -2.8362                 | 3.1362      |
|              | PM901        | -2.82500              | 1.40101    | 0.062 | -5.8112                 | 0.1612      |
|              | PM109-ΔG     | -4.72500*             | 1.40101    | 0.004 | -7.7112                 | -1.7388     |
| PM109-ΔG     | CK           | 0.37500               | 1.40101    | 0.793 | -2.6112                 | 3.3612      |
|              | 2P24         | 4.87500*              | 1.40101    | 0.003 | 1.8888                  | 7.8612      |
|              | PM901        | 1.90000               | 1.40101    | 0.195 | -1.0862                 | 4.8862      |
|              | 2P24-ΔG      | 4.72500*              | 1.40101    | 0.004 | 1.7388                  | 7.7112      |

\* The mean difference is significant at the 0.05 level.

CK a

2P24 b

PM901 ab

2P24- ΔG b

PM109- ΔG a

## Weight 7d

LSD

| treatmen(I) | treatment(J) | Mean Difference |            | Sig.  | 95% Confidence Interval |             |
|-------------|--------------|-----------------|------------|-------|-------------------------|-------------|
|             |              | (I-J)           | Std. Error |       | Lower Bound             | Upper Bound |
| CK          | 2P24         | 0.06250*        | 0.00907    | 0.000 | 0.0432                  | 0.0818      |
|             | PM901        | 0.01700         | 0.00907    | 0.080 | -0.0023                 | 0.0363      |
|             | 2P24-ΔG      | 0.03275*        | 0.00907    | 0.003 | 0.0134                  | 0.0521      |
|             | PM109-ΔG     | 0.04700*        | 0.00907    | 0.000 | 0.0277                  | 0.0663      |
| 2P24        | CK           | -0.06250*       | 0.00907    | 0.000 | -0.0818                 | -0.0432     |
|             | PM901        | -0.04550*       | 0.00907    | 0.000 | -0.0648                 | -0.0262     |
|             | 2P24-ΔG      | -0.02975*       | 0.00907    | 0.005 | -0.0491                 | -0.0104     |
|             | PM109-ΔG     | -0.01550        | 0.00907    | 0.108 | -0.0348                 | 0.0038      |
| PM901       | CK           | -0.01700        | 0.00907    | 0.080 | -0.0363                 | 0.0023      |
|             | 2P24         | 0.04550*        | 0.00907    | 0.000 | 0.0262                  | 0.0648      |
|             | 2P24-ΔG      | 0.01575         | 0.00907    | 0.103 | -0.0036                 | 0.0351      |
|             | PM109-ΔG     | 0.03000*        | 0.00907    | 0.005 | 0.0107                  | 0.0493      |
| 2P24-ΔG     | CK           | -0.03275*       | 0.00907    | 0.003 | -0.0521                 | -0.0134     |
|             | 2P24         | 0.02975*        | 0.00907    | 0.005 | 0.0104                  | 0.0491      |
|             | PM901        | -0.01575        | 0.00907    | 0.103 | -0.0351                 | 0.0036      |
|             | PM109-ΔG     | 0.01425         | 0.00907    | 0.137 | -0.0051                 | 0.0336      |
| PM109-ΔG    | CK           | -0.04700*       | 0.00907    | 0.000 | -0.0663                 | -0.0277     |
|             | 2P24         | 0.01550         | 0.00907    | 0.108 | -0.0038                 | 0.0348      |
|             | PM901        | -0.03000*       | 0.00907    | 0.005 | -0.0493                 | -0.0107     |
|             | 2P24-ΔG      | -0.01425        | 0.00907    | 0.137 | -0.0336                 | 0.0051      |

\* The mean difference is significant at the 0.05 level.

CK      a  
 2P24      c  
 PM901    ab  
 2P24- ΔG   b  
 PM109- ΔG   bc

## Weight 10d

LSD

| treatment(I) | treatment(J) | Mean Difference (I-J) | Std. Error | Sig.  | 95% Confidence Interval |             |
|--------------|--------------|-----------------------|------------|-------|-------------------------|-------------|
|              |              |                       |            |       | Lower Bound             | Upper Bound |
| CK           | 2P24         | 0.03350*              | 0.00688    | 0.000 | 0.0188                  | 0.0482      |
|              | PM901        | 0-.00250              | 0.00688    | 0.721 | -0.0172                 | 0.0122      |
|              | 2P24-ΔG      | 0.02675*              | 0.00688    | 0.001 | 0.0121                  | 0.0414      |
|              | PM109-ΔG     | 0.03575*              | 0.00688    | 0.000 | 0.0211                  | 0.0504      |
| 2P24         | CK           | -0.03350*             | 0.00688    | 0.000 | -0.0482                 | -0.0188     |
|              | PM901        | -0.03600*             | 0.00688    | 0.000 | -0.0507                 | -0.0213     |
|              | 2P24-ΔG      | -0.00675              | 0.00688    | 0.342 | -0.0214                 | 0.0079      |
|              | PM109-ΔG     | 0.00225               | 0.00688    | 0.748 | -0.0124                 | 0.0169      |
| PM901        | CK           | 0.00250               | 0.00688    | 0.721 | -0.0122                 | 0.0172      |
|              | 2P24         | 0.03600*              | 0.00688    | 0.000 | 0.0213                  | 0.0507      |
|              | 2P24-ΔG      | 0.02925*              | 0.00688    | 0.001 | 0.0146                  | 0.0439      |
|              | PM109-ΔG     | 0.03825*              | 0.00688    | 0.000 | 0.0236                  | 0.0529      |
| 2P24-ΔG      | CK           | -0.02675*             | 0.00688    | 0.001 | -0.0414                 | -0.0121     |
|              | 2P24         | 0.00675               | 0.00688    | 0.342 | -0.0079                 | 0.0214      |
|              | PM901        | -0.02925*             | 0.00688    | 0.001 | -0.0439                 | -0.0146     |
|              | PM109-ΔG     | 0.00900               | 0.00688    | 0.210 | -0.0057                 | 0.0237      |
| PM109-ΔG     | CK           | -0.03575*             | 0.00688    | 0.000 | -0.0504                 | -0.0211     |
|              | 2P24         | -0.00225              | 0.00688    | 0.748 | -0.0169                 | 0.0124      |
|              | PM901        | -0.03825*             | 0.00688    | 0.000 | -0.0529                 | -0.0236     |
|              | 2P24-ΔG      | -0.00900              | 0.00688    | 0.210 | -0.0237                 | 0.0057      |

\* The mean difference is significant at the 0.05 level.

CK        a  
 2P24     b  
 PM901   a  
 2P24- Δ G   b  
 PM109- Δ G   b
